# Supplementary material
Source: publisher figshare collection journal article supplement (https://acs.figshare.com/ndownloader/files/3585480)
Supplement: Supplementary file 1 [file 3585480]

## Supporting Information

Phase-separation on phospholipid membrane induces a characteristic localization of DNA accompanied by its structural transition

Ayako Kato<sup>a</sup>, Akihiko Tsuji<sup>b</sup>, Miho Yanagisawa<sup>c</sup>, Daisuke Saeki<sup>c</sup>, Kazuhiko Juni<sup>a</sup>, Yasunori Morimoto<sup>a</sup>, and Kenichi Yoshikawa<sup>\*,b,c</sup>

<sup>a</sup>Graduate School of Pharmaceutical Sciences, Josai University, Sakado 350-0295, Japan

<sup>b</sup>Spatio-Temporal Order, ICORP, Japan Science and Technology Agency, Tokyo 102-0075, Japan

<sup>c</sup>Department of Physics, Graduate School of Science, Kyoto University, Kyoto 606-8502, Japan

yoshikaw@scphys.kyoto-u.ac.jp

**Figure S1**

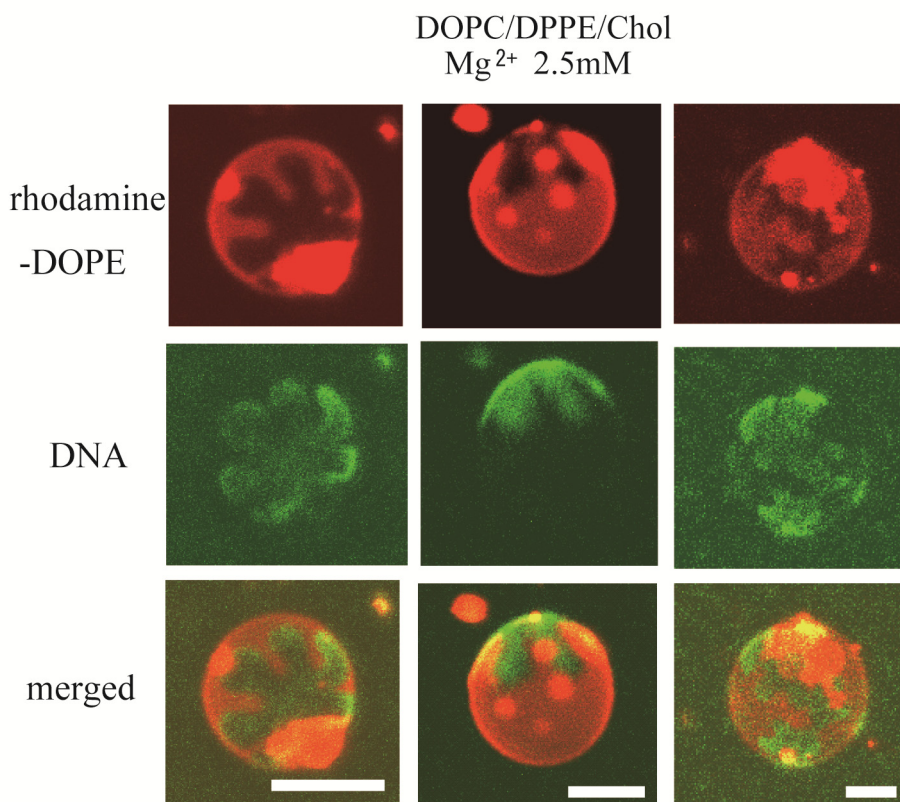

**Confocal laser-scanning fluorescence microscope images of Giant Unilamellar Vesicles (GUV).** GUVs composed of DOPC/DPPE/cholesterol/Rh-DOPE (molar ratio 3:3:3.5:0.006) were prepared through the natural-swelling method. T4 DNA labeled with the fluorescent dye YOYO-1 was then added to the GUV solution (2.5 mM MgCl<sub>2</sub> in Milli-Q water). The 488 and 543 nm laser lines were simultaneously used to irradiate the GUVs, and a phospholipid (Rh-DOPE) image and a DNA image were obtained simultaneously at each fluorescence channel. The merged image is also shown. The focus was on the upper surface of each GUV. The image-acquisition time was 1.57 s. Scale bars; 10  $\mu$ m.
